# Supplementary material for: Engineering a surface defect-rich Ti3C2 quantum dots/mesoporous C3N4 hollow nanosphere Schottky junction for efficient N2 photofixation
Source: Royal Society of Chemistry journal article supplement (doi:10.1039/d1ta09941h), 2022-01-01
Supplement: d1ta09941h1.pdf [file d1ta09941h1.pdf]

## Electronic supplementary information

### Engineering surface defects-rich $\text{Ti}_3\text{C}_2$ quantum dots/mesoporous $\text{C}_3\text{N}_4$ hollow nanosphere Schottky junction for efficient $\text{N}_2$ photofixation

Binbin Chang,<sup>a</sup> Yanzhen Guo,<sup>b</sup> Huili Liu,<sup>b</sup> Li Li,<sup>\*a</sup> and Baocheng Yang<sup>\*b</sup>

<sup>a</sup>Shanghai Key Laboratory of Green Chemistry and Chemical Processes, School of Chemistry and Molecular Engineering, East China Normal University, Shanghai 200241, China

<sup>b</sup>Henan Provincial Key Laboratory of Nanocomposites and Applications, Institute of Nanostructured Functional Materials, Huanghe Science and Technology College, Zhengzhou 450006, China

#### Apparent quantum efficiency measurements

For the measurement of the apparent quantum efficiencies (AQEs), the  $\text{N}_2$  photofixation reactions were performed under monochromatic light using appropriate bandpass filters at different wavelengths (380, 420, 475, 520, 550, 600, 650 and 700 nm, full widths at half maximum for all: 20 nm, Beijing MerryChange Technology). The corresponding power intensities were measured using an optical power meter (Molelectron POWER MAX 5200). The AQEs under different monochromatic light were calculated according to the following equation

$$AQE (\%) = \frac{N_{\text{reacted}}}{N_{\text{incident}}} \times 100\% = \frac{3N_{\text{NH}_3}}{N_{\text{incident}}} \times 100\% = \frac{3n_{\text{NH}_3} \times N_A}{(W \times A \times t)/(h\nu)} \times 100\%$$

where  $N_{\text{reacted}}$ ,  $N_{\text{incident}}$  and  $N_{\text{NH}_3}$  represent the numbers of the reacted electrons, the incident photons and the generated  $\text{NH}_3$  molecules, respectively,  $W$ ,  $A$  and  $t$  respectively denote the light intensity, illumination area and illumination time,  $\nu$  is the light frequency,  $h$  is Planck's constant, and  $N_A$  is Avogadro's constant.

### Solar-to-ammonia conversion efficiency measurements

To determine the solar-to-ammonia (STA) conversion efficiency, the photocatalytic  $N_2$  fixation reactions were carried out in a sealed reactor under simulated AM1.5G light illumination. Typically, 200 mg of the photocatalyst and 50 mL of water were added into the reactor. The reaction system was vacuumed and blown with  $N_2$  repeatedly several times to drive out the dissolved air completely and then sealed with a rubber plug. To make sure that the reaction system was filled with  $N_2$ , it was further bubbled for another 1 h with a  $N_2$ -filled balloon. After the reaction solution was subjected under the simulated AM1.5G light illumination for 1 h, the produced ammonia amount was determined using Nessler's method. In addition, the evolved gases were also measured on a gas chromatograph (CEAULIGHT GC-7900, TCD detector, Ar carrier gas). The photocatalytic reaction was repeated three times.

The STA efficiency was calculated based on the equation below

$$STA \text{ efficiency} = \frac{[\Delta G^0 \text{ for } NH_3 \text{ generation (J mol}^{-1}\text{)}] \times [\text{evolved } NH_3 \text{ (mol)}]}{[\text{total input light power (W)}] \times [\text{reaction time (s)}]} \quad (3)$$

Similarly, the solar-to-hydrogen (STH) efficiency can be calculated as

$$STH \text{ efficiency} = \frac{[\Delta G^0 \text{ for } H_2 \text{ generation (J mol}^{-1}\text{)}] \times [\text{evolved } H_2 \text{ (mol)}]}{[\text{total input light power (W)}] \times [\text{reaction time (s)}]}$$

In the above equation, the  $\Delta G^0$  value for  $NH_3$  and  $H_2$  generation are 339 and 237 kJ  $mol^{-1}$ . The overall illumination intensity of the AM 1.5G light source was 100  $mW\ cm^{-2}$  and the illumination area is 23.75  $cm^2$ .

### Electrochemical measurements

To prepare the working electrode, the catalyst was first dispersed in an ethanolic solution of Nafion (5.0 vol%) to form an ink (10  $mg\ mL^{-1}$ ). The resultant dispersion (0.2 mL) was then dip-coated onto an indium tin oxide (ITO)-coated glass electrode with a coated area of 1  $cm^2$  and allowed to dry in a vacuum oven overnight at room temperature. The photocurrent and electrochemical impedance spectroscopy (EIS) measurements were conducted on an electrochemical workstation (CHI 760E, Shanghai Chenhua) in a three-electrode system with an electrolyte solution of 0.5 M  $Na_2SO_4$ , using Pt foil as the counter electrode, the standard Ag/AgCl electrode as the reference electrode, and the ITO substrate as the working electrode. All measurements were carried out at room temperature in  $Na_2SO_4$  aqueous solution that has been

deoxygenated by bubbling high-purity Ar for 30 min. Photocurrent measurements were performed at a potential of 0.2 V (vs. Ag/AgCl) under visible light irradiation (300 mW/cm<sup>2</sup>).

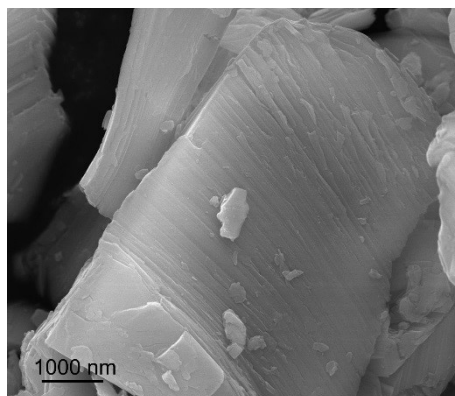

**Fig. S1** SEM image of Ti<sub>3</sub>AlC<sub>2</sub>.

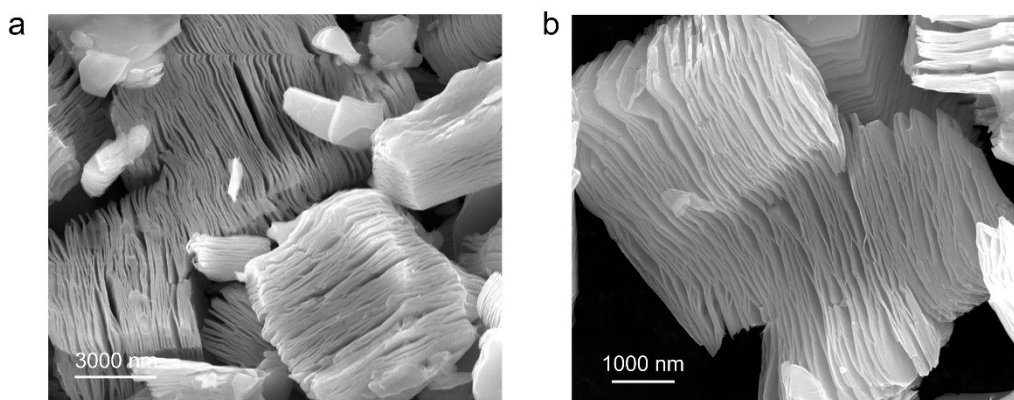

**Fig. S2** SEM images of Ti<sub>3</sub>C<sub>2</sub> MXene. (a) Low magnification. (b) High magnification.

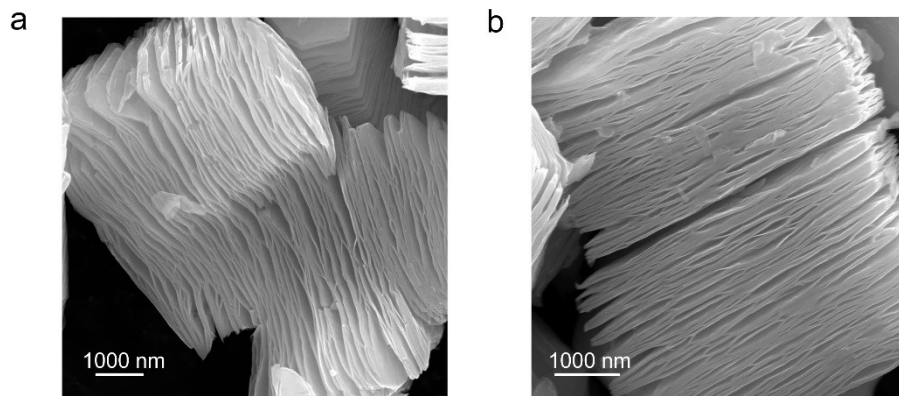

**Fig. S3** SEM images of r-Ti<sub>3</sub>C<sub>2</sub> MXene.

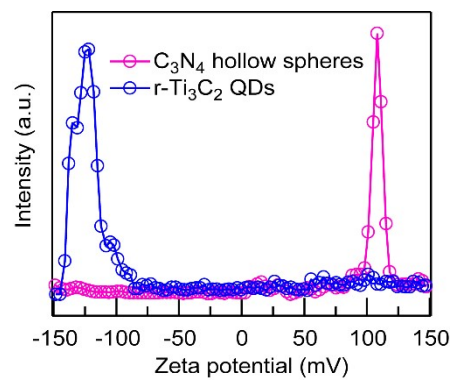

**Fig. S4** Zeta potential measurements. The Zeta potentials of C<sub>3</sub>N<sub>4</sub> hollow spheres and r-Ti<sub>3</sub>C<sub>2</sub> QDs.

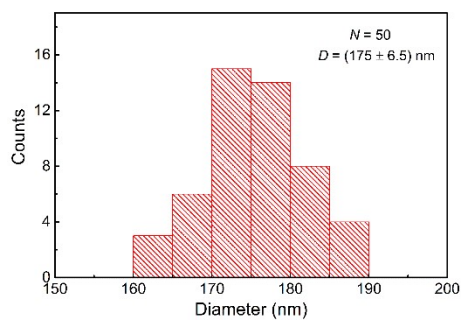

**Fig. S5** Histogram of the diameter distribution of solid silica spheres

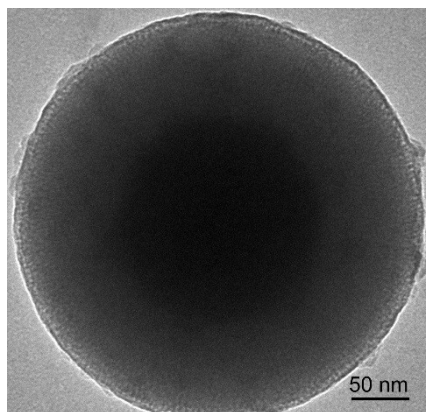

**Fig. S6** The high-magnification TEM image of SiO<sub>2</sub>@mSiO<sub>2</sub>.

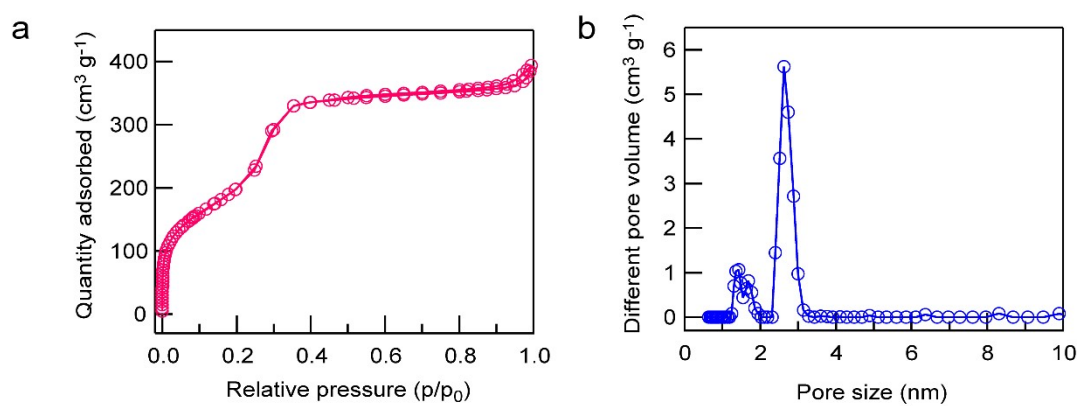

**Fig. S7** (a) The N<sub>2</sub> adsorption-desorption isotherm of SiO<sub>2</sub>@mSiO<sub>2</sub> and (b) pore size distribution of SiO<sub>2</sub>@mSiO<sub>2</sub>.

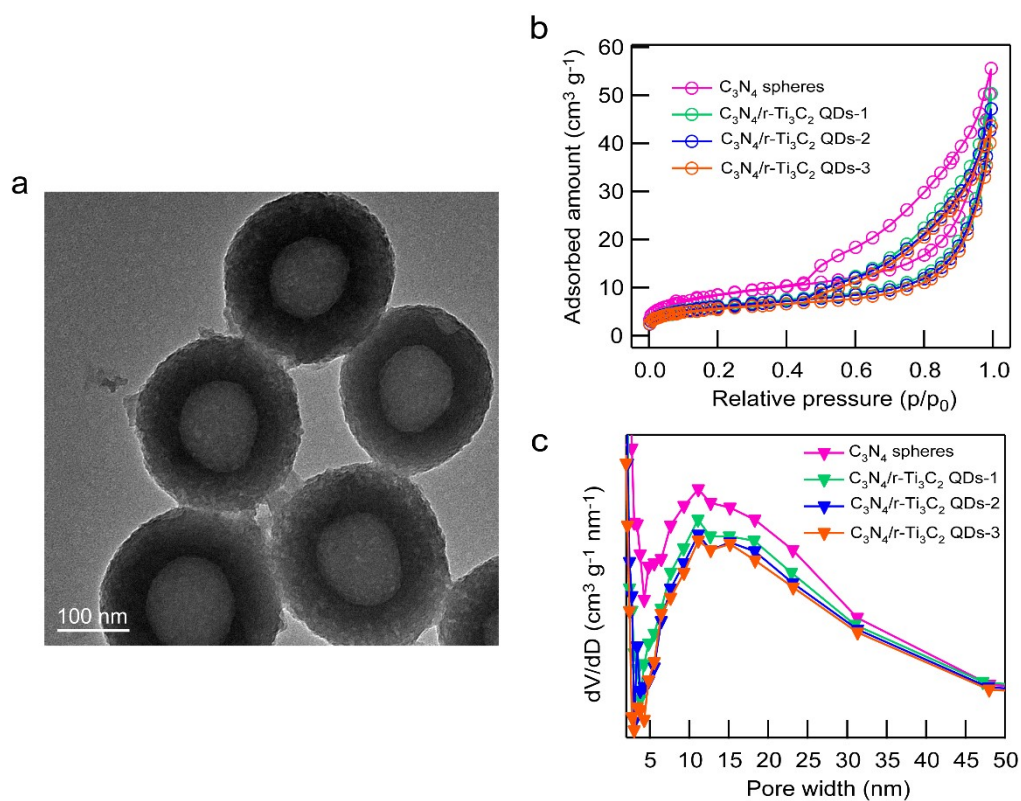

**Fig. S8** (a) The high-magnification TEM image of C<sub>3</sub>N<sub>4</sub> hollow spheres. (b) The N<sub>2</sub> adsorption-desorption isotherms of C<sub>3</sub>N<sub>4</sub> hollow spheres and C<sub>3</sub>N<sub>4</sub>/r-Ti<sub>3</sub>C<sub>2</sub> QDs. (c) The pore size distribution of C<sub>3</sub>N<sub>4</sub> hollow spheres and C<sub>3</sub>N<sub>4</sub>/r-Ti<sub>3</sub>C<sub>2</sub> QDs.

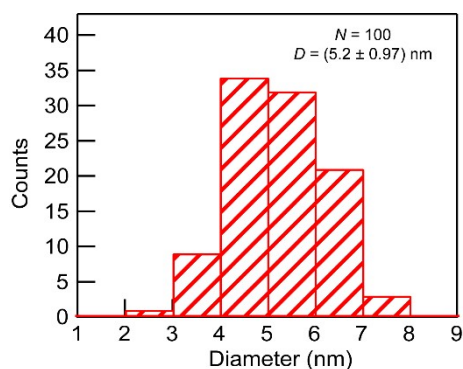

**Fig. S9** Histogram of the diameter distribution of r-Ti<sub>3</sub>C<sub>2</sub> QDs.

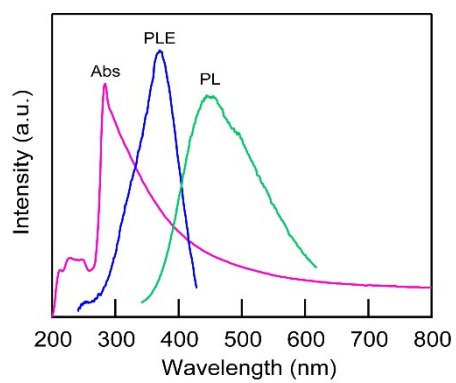

**Fig. S10** UV-vis absorbance, the maximum excitation and emission spectra of the r-Ti<sub>3</sub>C<sub>2</sub> QDs

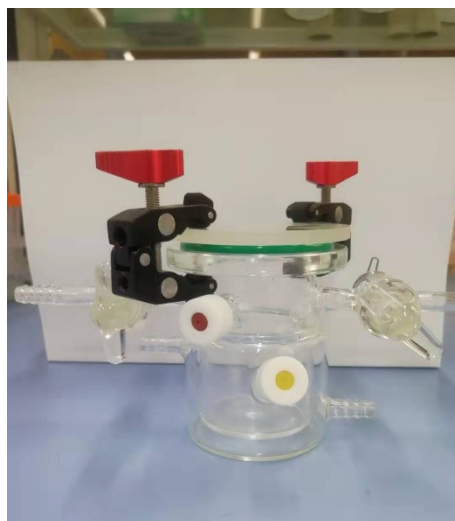

**Fig. S11** Photograph of the photocatalytic N<sub>2</sub> fixation reactor.

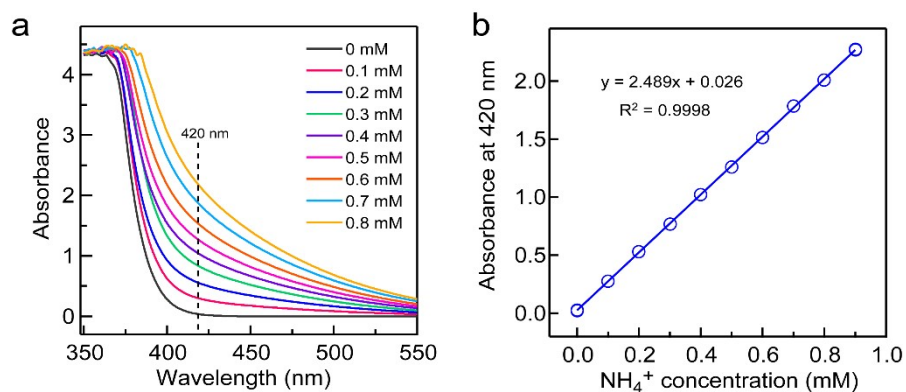

**Fig. S12** Dependence of the absorbance on the  $\text{NH}_4^+$  determination. (a) Absorption spectra of the standard  $\text{NH}_4^+$  solutions at different concentrations. (b) Linear relationship between the absorbance at 420 nm and the  $\text{NH}_4^+$  concentration.

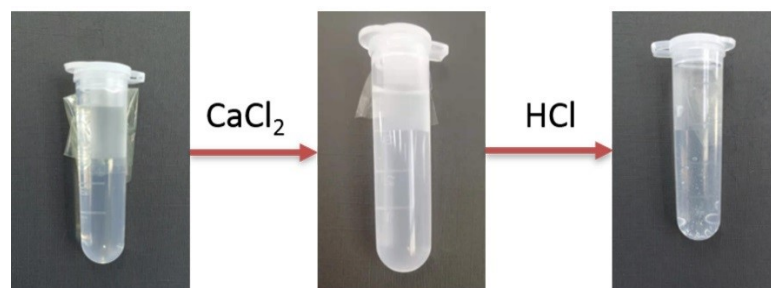

**Fig. S13** Identification of carbonate in the products.

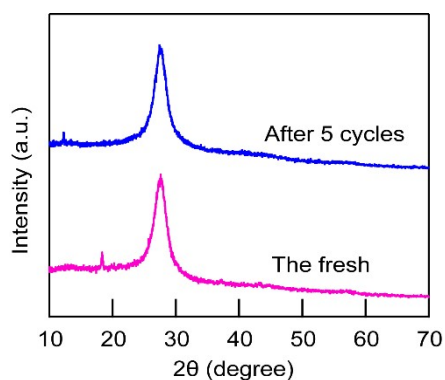

**Fig. S14** XRD patterns of the fresh  $\text{C}_3\text{N}_4/\text{r-Ti}_3\text{C}_2$  QDs-2 and after the fifth cycle of test.



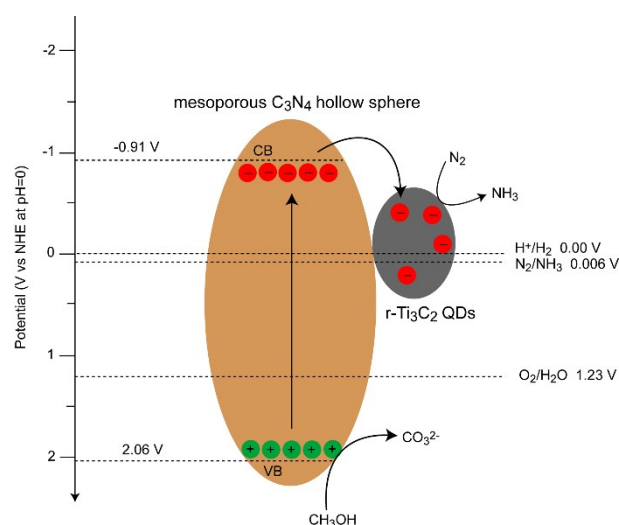

**Fig. S15** Band energy diagram of the  $C_3N_4/r-Ti_3C_2$  QDs Schottky junction.

**Table S1** Comparison of different reported photocatalysts for photocatalytic  $N_2$  fixation.

| Photocatalysts                            | Experimental conditions                 | $NH_3$ production rate ( $\mu mol h^{-1} g^{-1}_{cat}$ ) | Test methods      | Ref.      |
|-------------------------------------------|-----------------------------------------|----------------------------------------------------------|-------------------|-----------|
| Fe-EDTA- $C_3N_4$                         | RT; visible light; methanol             | 50                                                       | Nessler's reagent | 1         |
| Hollow porous prismatic $C_3N_4$ with NVs | RT; visible light; methanol             | 118                                                      | Nessler's reagent | 2         |
| Au/ $TiO_2$ -OVs                          | RT; visible light; methanol             | 78.6                                                     | Indophenol blue   | 3         |
| Fe(III)- $C_3N_4$                         | RT; visible light                       | 48.7                                                     | Nessler's reagent | 4         |
| BiOBr-001-OVs                             | RT; visible light                       | 104.2                                                    | Indophenol blue   | 5         |
| Bio-carbon-doped $C_3N_4$                 | RT; visible light; methanol             | 167.35                                                   | Nessler's reagent | 6         |
| MXene/ $TiO_2$ /Co                        | RT; UV-visible light                    | 110                                                      | Nessler's reagent | 7         |
| $TiO_2$ -250-OVs                          | RT; white light; methanol               | 116                                                      | Nessler's reagent | 8         |
| Fe- $TiO_2$ /Au                           | RT; visible light                       | 22.4                                                     | Indophenol blue   | 9         |
| $C_3N_4/r-Ti_3C_2$ QDs                    | RT; white light/visible light; methanol | 328.9/197.8                                              | Nessler's reagent | This work |

RT, room temperature; NVs, nitrogen vacancies; OVs, oxygen vacancies

**Table S2** AQEs for N<sub>2</sub> photofixation in recent works

| Photocatalyst                                                                      | AQE              | Reference |
|------------------------------------------------------------------------------------|------------------|-----------|
| Au/hollow mesoporous C <sub>3</sub> N <sub>4</sub> spheres with NVs                | 0.64% at 550 nm  | 10        |
| Fe <sub>2</sub> O <sub>3</sub> loaded porous g-C <sub>3</sub> N <sub>4</sub>       | 0.096% at 365 nm | 11        |
| AgInS <sub>2</sub> /Ti <sub>3</sub> C <sub>2</sub> Z-scheme heterojunction         | 0.07% at 420 nm  | 12        |
| Cu-doped TiO <sub>2</sub>                                                          | 0.23% at 420 nm  | 13        |
| Layered reduced Ti <sub>3</sub> C <sub>2</sub> /Au                                 | 0.697% at 520 nm | 14        |
| MXene-derived TiO <sub>2</sub> @C@g-C <sub>3</sub> N <sub>4</sub>                  | 0.14% at 420 nm  | 15        |
| Nitrogen defective C <sub>3</sub> N <sub>4</sub> /BiO quantum dots                 | 0.53% at 400 nm  | 16        |
| Ti <sub>3</sub> C <sub>2</sub> T <sub>x</sub> /TiO <sub>2</sub> calcined at 400 °C | 0.05% at 630 nm, | 17        |
| F modified TiO <sub>2</sub> with OVs                                               | 0.38% at 420 nm  | 18        |
| Bi <sub>2</sub> WO <sub>6</sub> with OVs                                           | 0.04% at 420 nm  | 19        |
| MoO <sub>3-x</sub> nanosheets                                                      | 0.31% at 808 nm  | 20        |
| C <sub>3</sub> N <sub>4</sub> /r-Ti <sub>3</sub> C <sub>2</sub> QDs                | 0.92% at 380 nm  | This work |

AQE, apparent quantum efficiency; NVs, nitrogen vacancies; OVs, oxygen vacancies.

## References

- 1 C. K. Yao, R. Wang, Z. S. Wang, H. Lei, X. P. Dong and C. Z. He, *J. Mater. Chem. A*, 2019, **7**, 27547.
- 2 T. Huang, S. G. Pan, L. L. Shi, A. P. Yu, X. Wang and Y. S. Fu, *Nanoscale*, 2020, **12**, 1833.
- 3 J. H. Yang, Y. Z. Guo, R. B. Jiang, F. Qin, H. Zhang, W. Z. Lu, J. F. Wang and J. C. Yu, *J. Am. Chem. Soc.*, 2018, **140**, 8497.
- 4 H. Zeng, L. L. Liu, D. T. Zhang, Y. Wang, Z. H. Li, C. Liu, L. Zhang and X. Q. Cui, *Mater. Chem. Phys.*, 2021, **258**, 123830.
- 5 H. Li, J. Shang, Z. H. Ai and L. Z. Zhang, *J. Am. Chem. Soc.*, 2015, **137**, 6393.
- 6 Z. Tang, L. J. Xiong, X. Y. Zhang, J. Y. Shen, A. W. Sun, X. Y. Lin and Y. Yang, *Small*, 2021, 2105217.
- 7 W. G. Gao, X. M. Li, S. J. Luo, Z. L. Luo, X. Zhang, R. Huang and M. Luo, *J. Colloid Interface Sci.*, 2021, **585**, 20-29.
- 8 Q. Y. Liu, H. D. Wang, R. Tang, Q. Cheng and Y. J. Yuan, *ACS Appl. Nano Mater.*, 2021, **4**, 8674.
- 9 J. H. Yang, H. Y. Bai, Y. Z. Guo, H. Zhang, R. B. Jiang, B. C. Yang, J. F. Wang and J. C. Yu, *Angew. Chem. Int. Ed.*, 2021, **60**, 927.
- 10 Y. Z. Guo, J. H. Yang, D. H. Wu, H. Y. Bai, Z. Yang, J. F. Wang and B. C. Yang, *J. Mater. Chem. A*, 2020, **8**, 16218.
- 11 S. Z. Liu, S. B. Wang, Y. Jiang, Z. Q. Zhao, G. Y. Jiang and Z. Y. Sun, *Chem. Eng. J.*, 2019, **373**, 572.
- 12 J. Z. Qin, X. Hu, X. Y. Li, Z. F. Yin, B. J. Liu and K. Lam, *Nano Energy*, 2019, **61**, 27.
- 13 Y. X. Zhao, Y. F. Zhao, R. Shi, B. Wang, G. I. N. Waterhouse, L. Z. Wu, C. H. Tung and T. R. Zhang, *Adv. Mater.*, 2019, **31**, 1806482.
- 14 B. B. Chang, Y. Z. Guo, D. H. Wu, L. Li, B. C. Yang and J. F. Wang, *Chem. Sci.*, 2021, **12**, 11213.
- 15 Q. X. Liu, L. H. Ai and J. Jiang, *J. Mater. Chem. A*, 2018, **6**, 4102.
- 16 C. Liang, H. Y. Niu, H. Guo, C. G. Niu, Y. Y. Yang, H. Y. Liu, W. W. Tang and H. P. Feng, *Chem. Eng. J.*, 2021, **406**, 12868.
- 17 T. T. Hou, Q. Li, Y. D. Zhang, W. K. Zhu, K. F. Yu, S. M. Wang, Q. Xu, S. Q. Liang and L. B. Wang, *Appl. Catal. B: Environ.*, 2020, **273**, 119072.

- 18 R. Q. Guan, D. D. Wang, Y. J. Zhang, C. Liu, W. Xu, J. O. Wang, Z. Zhao, M. Feng, Q. K. Shang and Z. C. Sun, *Appl. Catal. B: Environ.*, 2021, **282**, 119580.
- 19 T. Y. Wang, C. T. Feng, J. Q. Liu, D. J. Wang, H. M. Hu, J. Hu, Z. Chen and G. L. Xue, *Chem. Eng. J.*, 2021, **414**, 128827.
- 20 H. Y. Wu, X. Li, Y. Cheng, Y. H. Xiao, R. F. Li, Q. P. Wu, H. Lin, J. Xu, G. Q. Wang, C. Lin, X. Y. Chen and Y. S. Wang, *J. Mater. Chem. A*, 2020, **8**, 2827.
